# Supplementary figures and images for: Spectrometric study of condensed phase species of thorium- and palladium-based modifiers in a complex matrix for electrothermal atomic absorption spectrometry
Source: Royal Society of Chemistry journal article supplement (doi:10.1039/b612648k), 2007-01-01

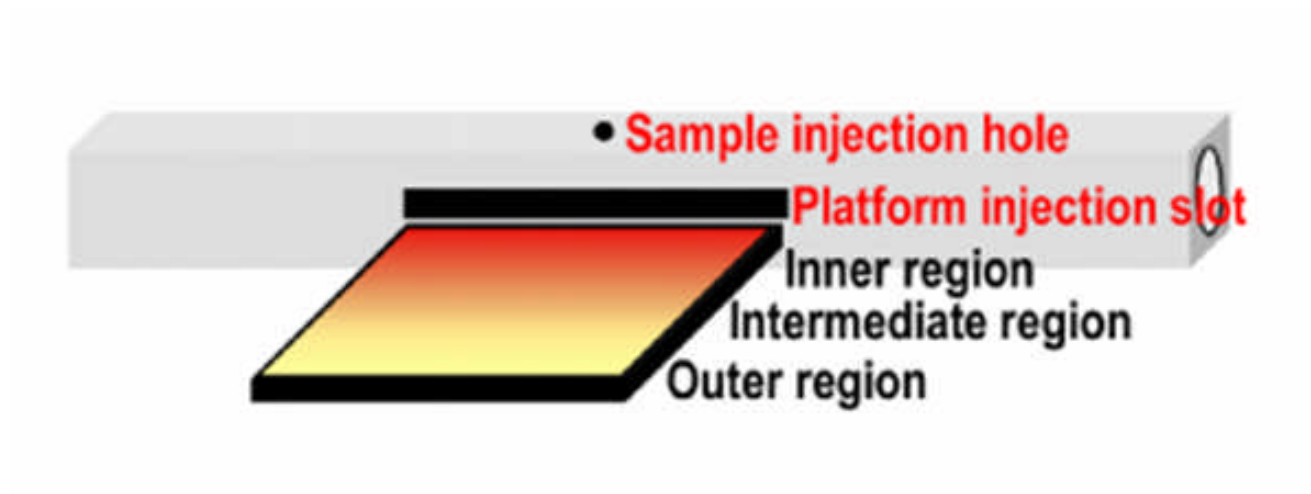

Supplement: b612648k-fs1.pdf [file b612648k-fs1.pdf]

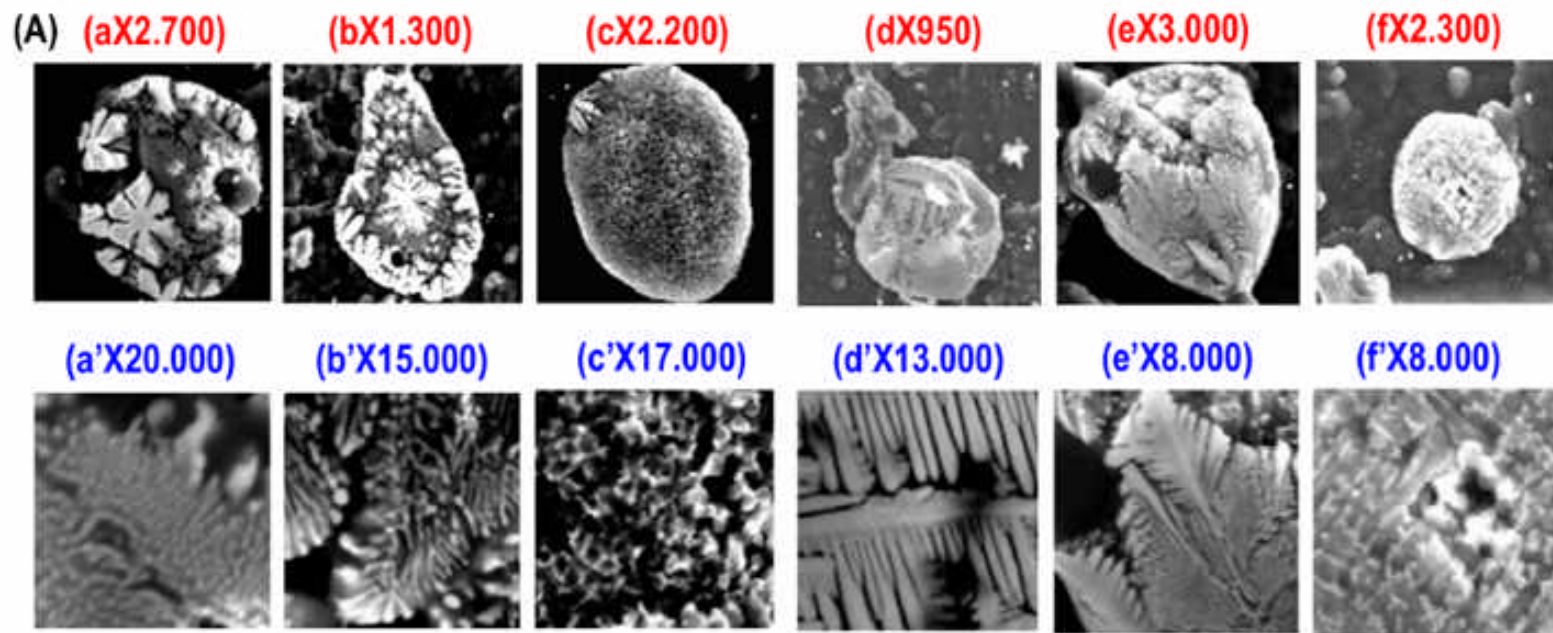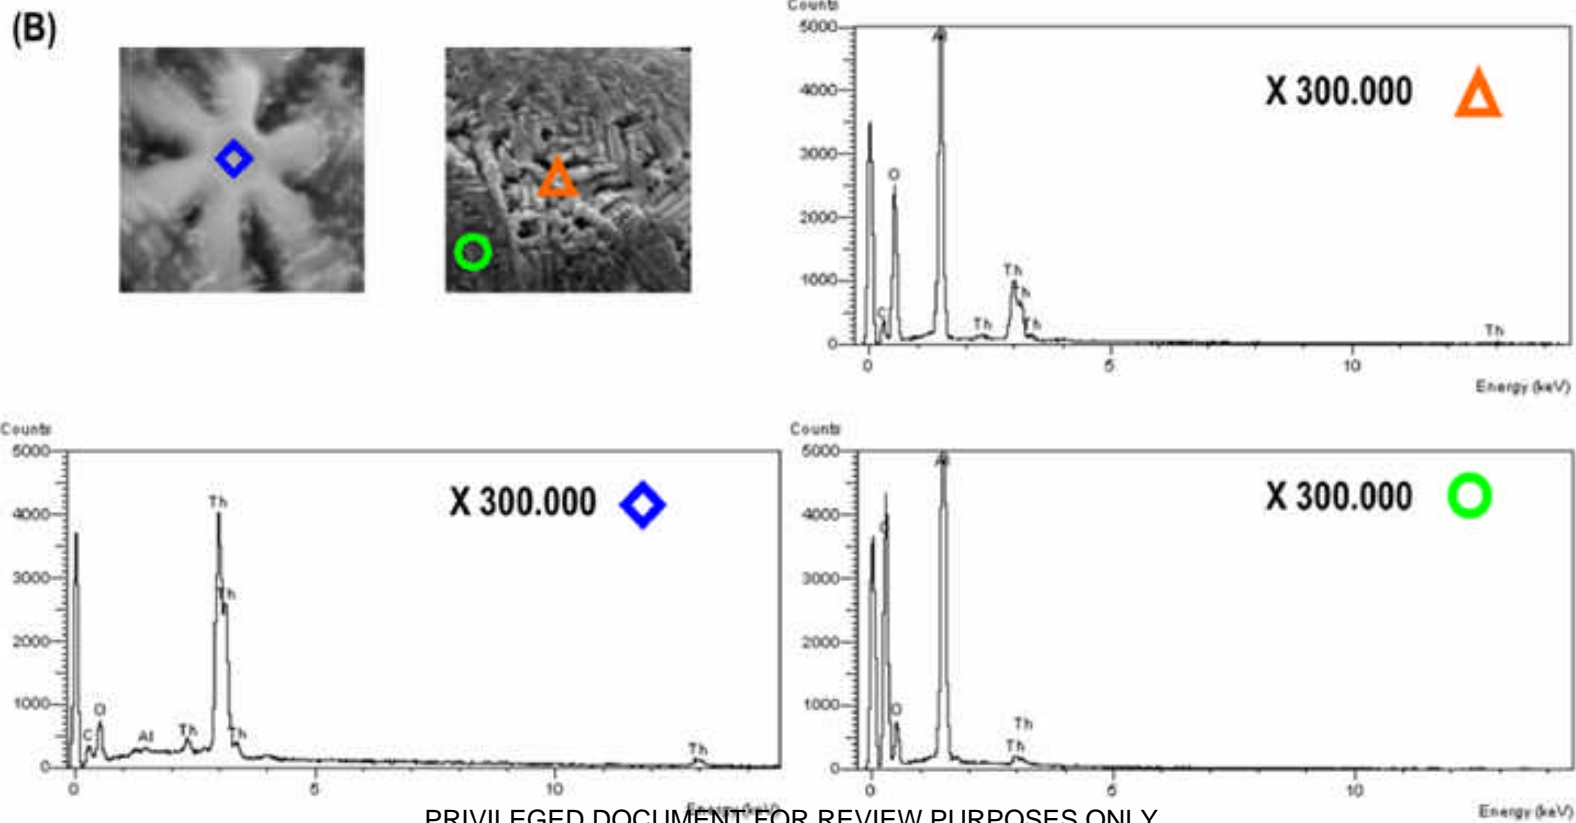

Supplement: b612648k-fs2.pdf [file b612648k-fs2.pdf]

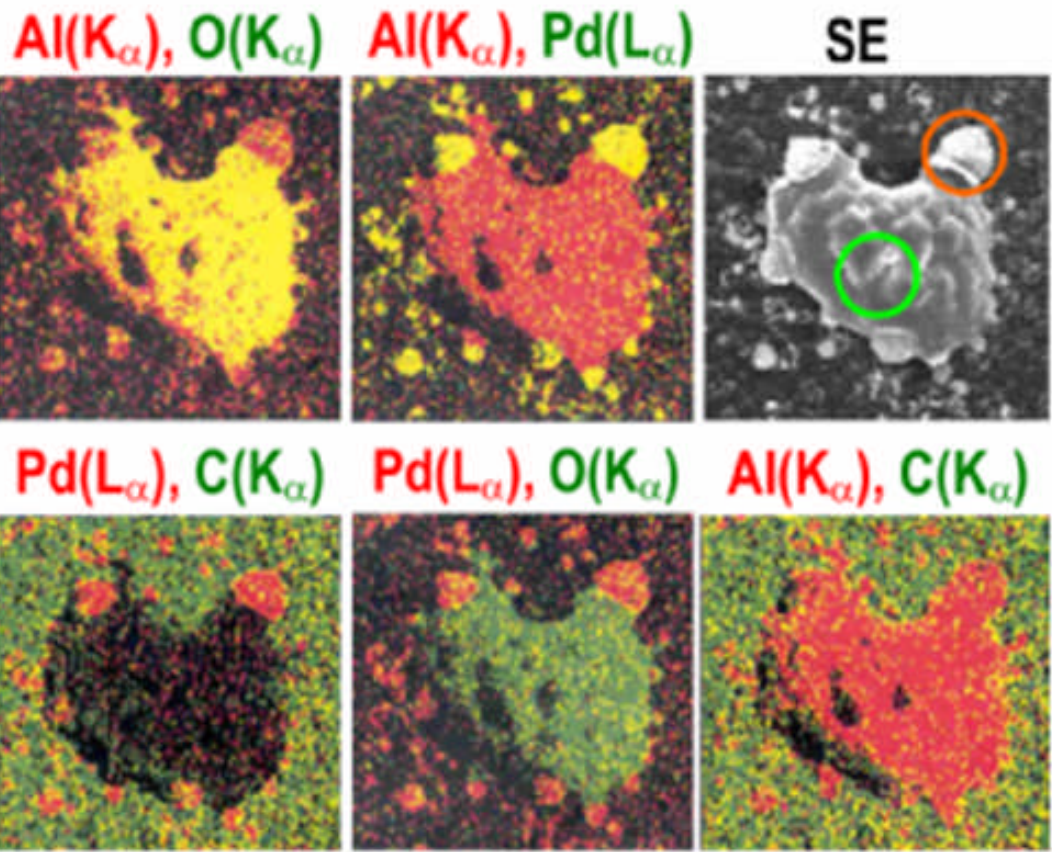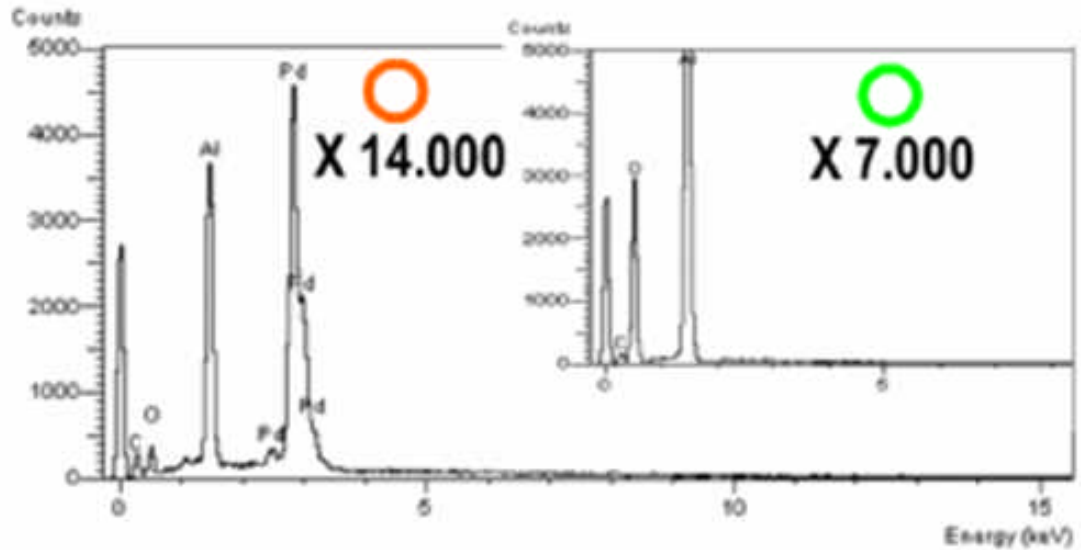

Supplement: b612648k-fs4.pdf [file b612648k-fs4.pdf]

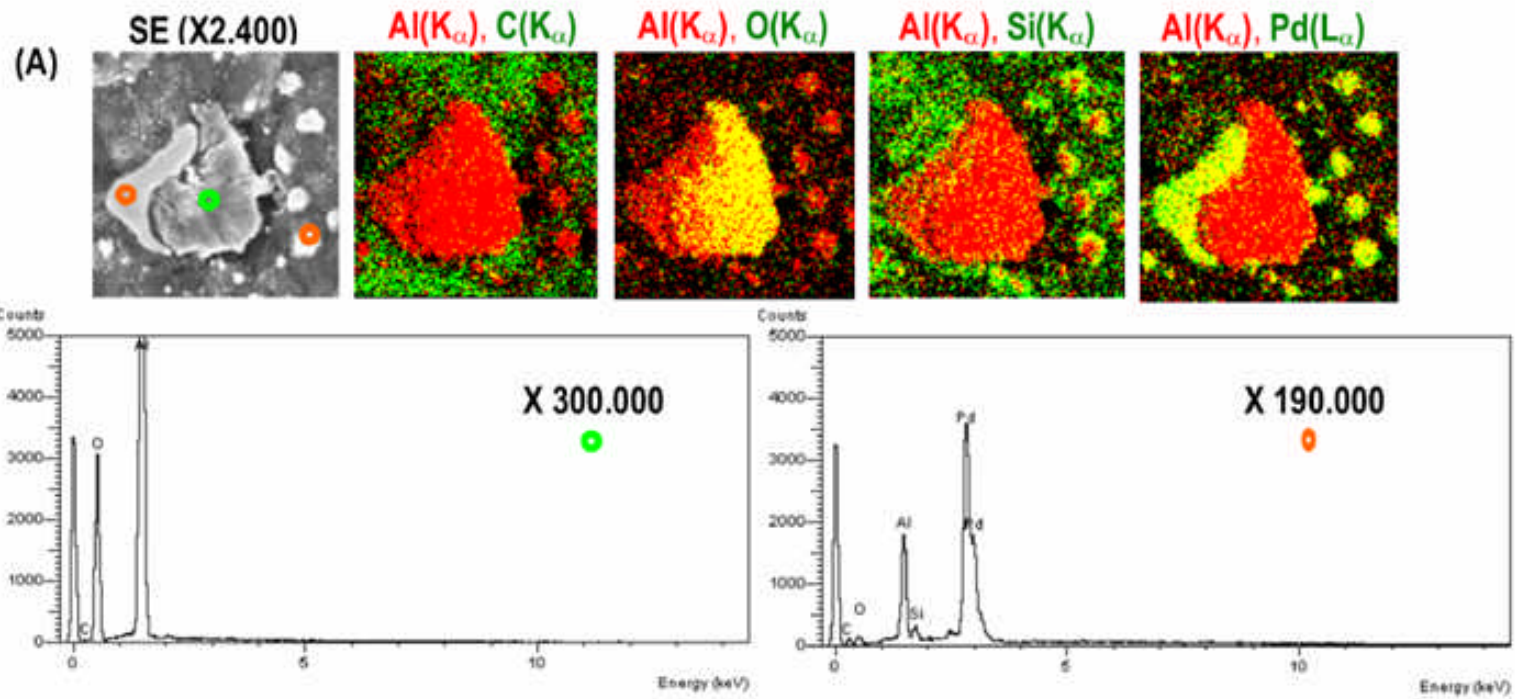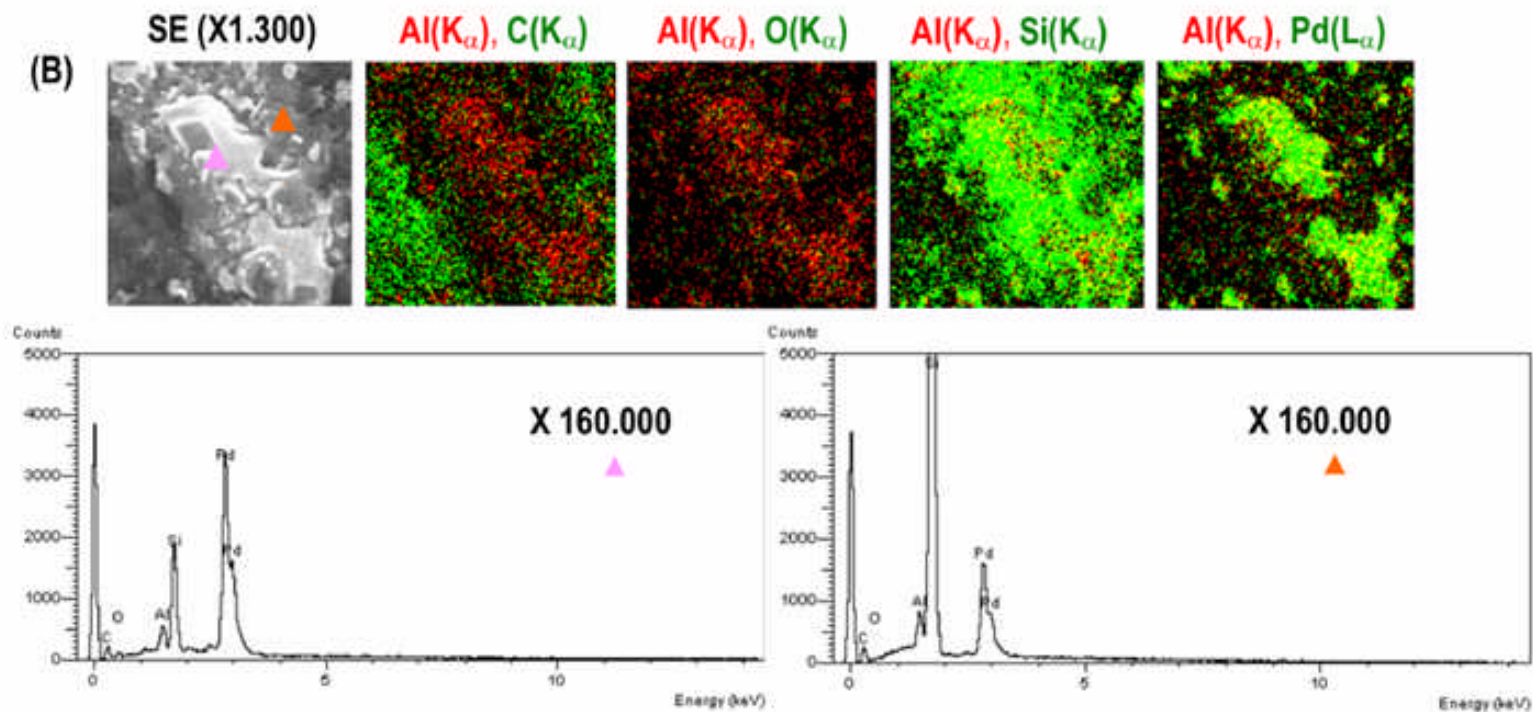

Supplement: b612648k-fs5.pdf [file b612648k-fs5.pdf]

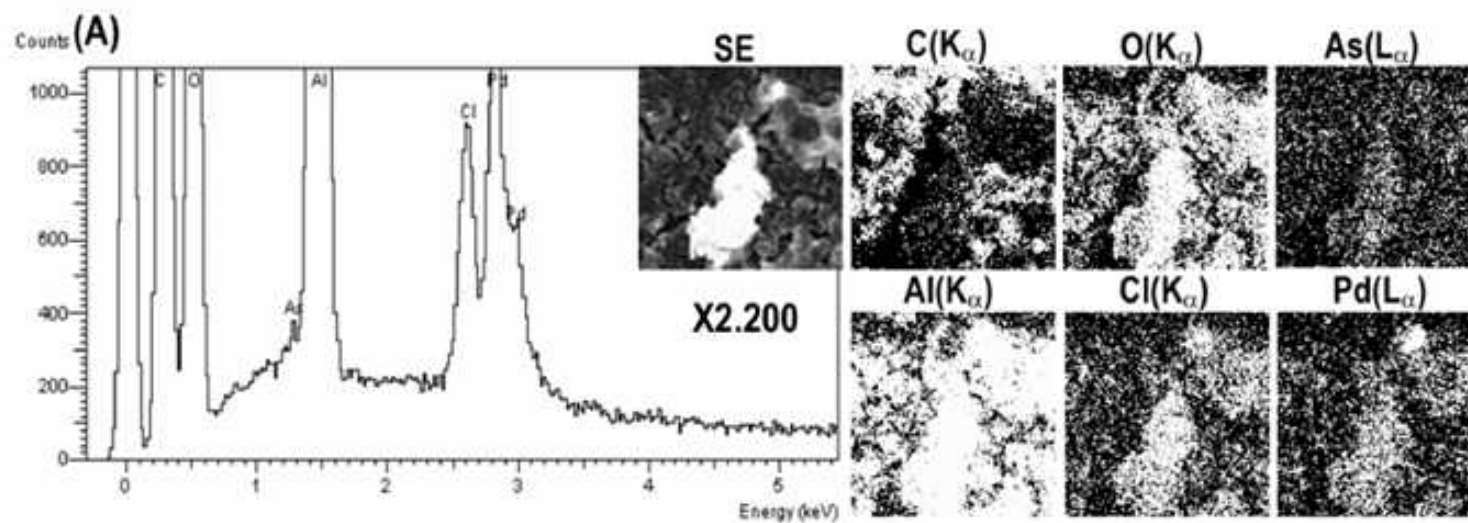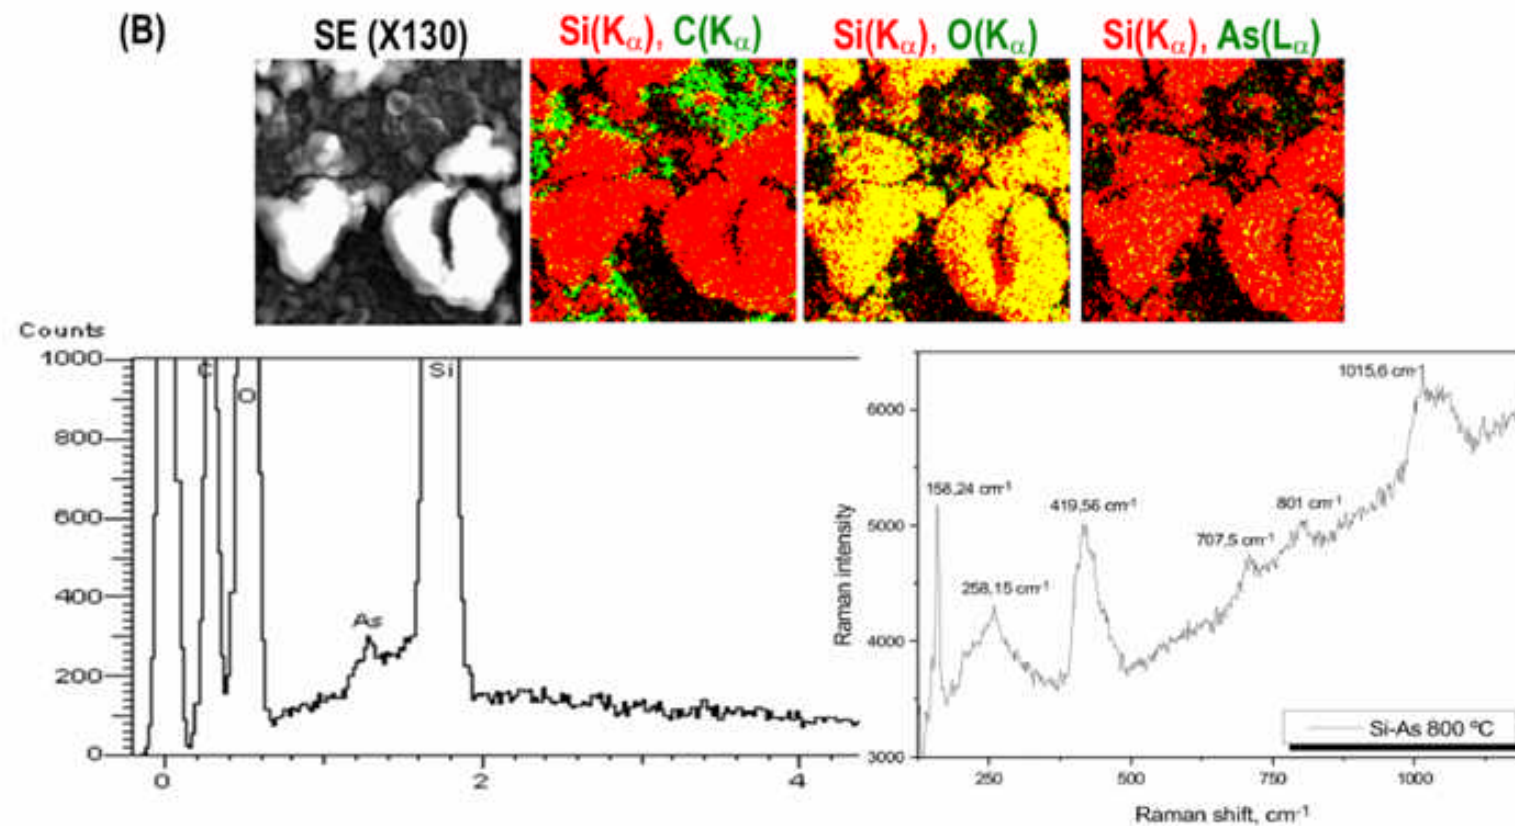

Supplement: b612648k-fs6.pdf [file b612648k-fs6.pdf]
